# Supplementary material
Source: Springer Nature journal article supplement (https://www.springermedizin.de/resource/supplementary/12986_2010_312_MOESM9_ESM.pdf/25655808)

# CITRATE CYCLE (TCA CYCLE)

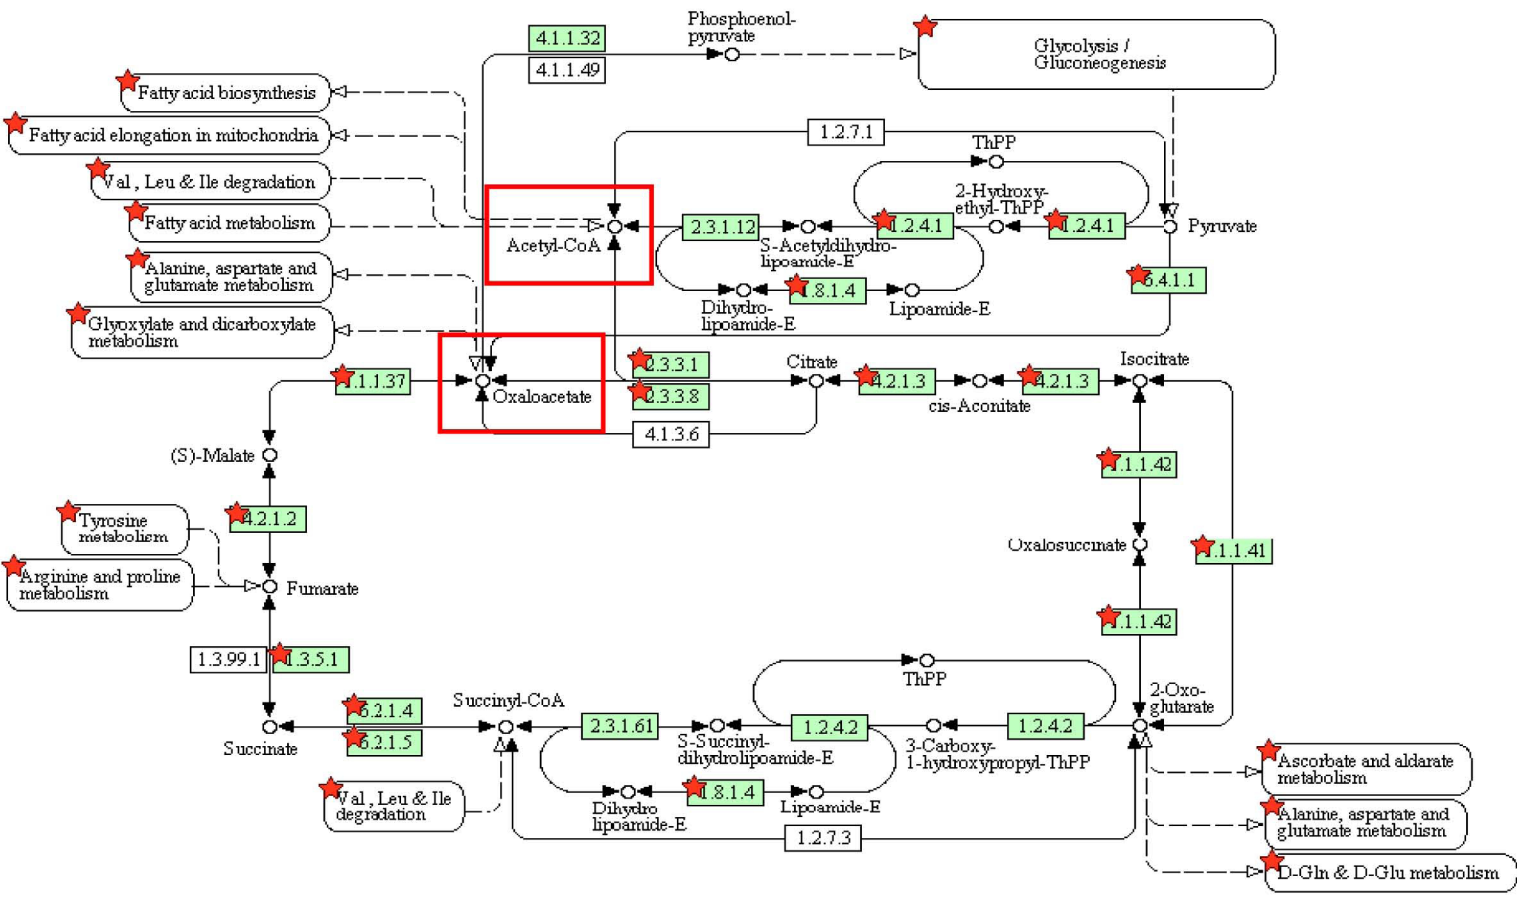

Supplement: MOESM9 [file 25655808]
